# Supplementary material for: Conformal Coating of Stem Cell-Derived Islets for β Cell Replacement in Type 1 Diabetes
Source: PubMed Central journal article supplement (PMC6962554; doi:10.1016/j.stemcr.2019.11.004), 2019-12-12
Supplement: mmc1.pdf [file mmc1.pdf]

**Stem Cell Reports, Volume 14**

**Supplemental Information**

**Conformal Coating of Stem Cell-Derived Islets for  $\beta$  Cell Replacement in  
Type 1 Diabetes**

**Aaron A. Stock, Vita Manzoli, Teresa De Toni, Maria M. Abreu, Yeh-Chuin Poh, Lillian Ye, Adam Roose, Felicia W. Pagliuca, Chris Thanos, Camillo Ricordi, and Alice A. Tomei**

## Supplemental Figure and legend

Figure S1:

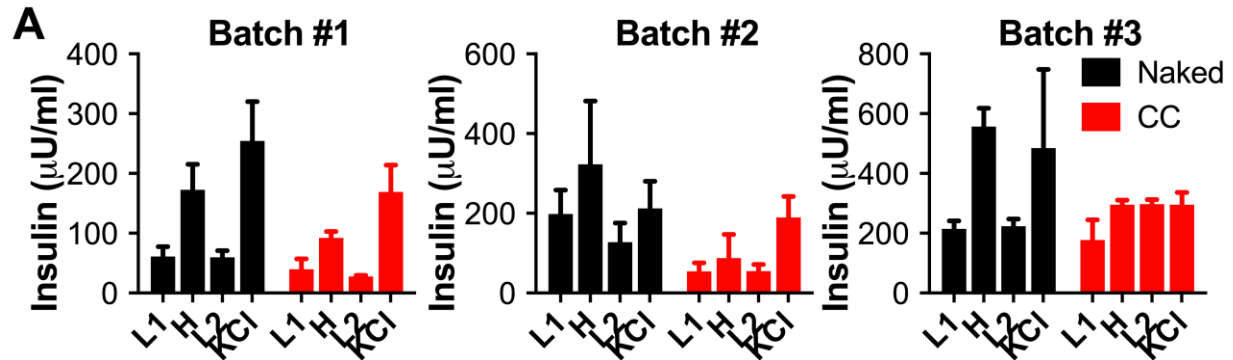

**Figure S1: *In vitro* GSIS assessment of unencapsulated and CC SC-islets**

(A) GSIS functionality of three independent batches of unencapsulated (black, naked) and conformal coated (red, CC) SC-islets 48 hours (S6d11) after encapsulation as absolute insulin secretion ( $n=3$  wells assayed per condition) during sequential stimulation with 2.8mM glucose (L), 20mM glucose (H), 2.8mM glucose (L), and 30mM KCl.
